# Supplementary material for: Promotion of phenol photodegradation based on novel self-assembled magnetic bismuth oxyiodide core–shell microspheres
Source: Royal Society of Chemistry journal article supplement (doi:10.1039/c7ra06116a), 2017-01-01
Supplement: c7ra06116a1.pdf [file c7ra06116a1.pdf]

*Supplementary Information for*

**Promotion of phenol photodegradation based on novel self-assembled  
magnetic BiOI core-shell microspheres**

Danlin Qian,<sup>a</sup> Suting Zhong,<sup>a</sup> Suyun Wang,<sup>a</sup> Yaru Lai,<sup>a</sup> Nan Yang,<sup>a</sup> Wei  
Jiang<sup>a\*</sup>

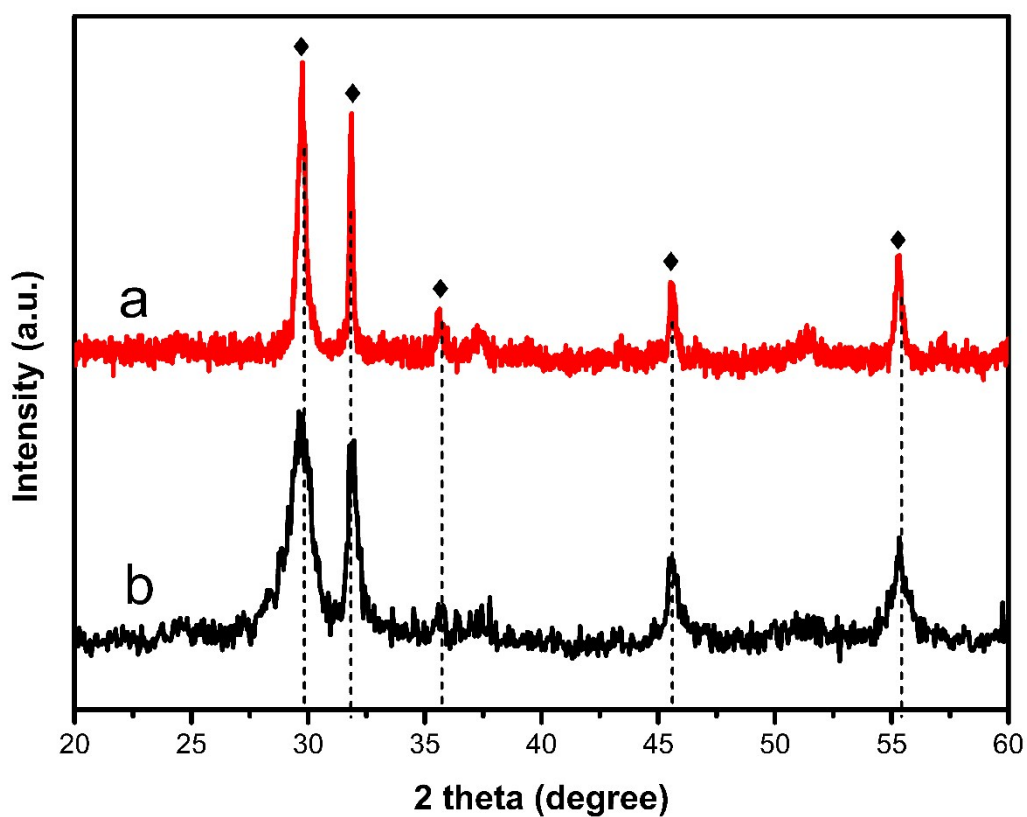

**Fig. S1. XRD patterns of (a) before and (b) after the photocatalytic reaction of  $\text{PONs}_{(1/3)}$ .**

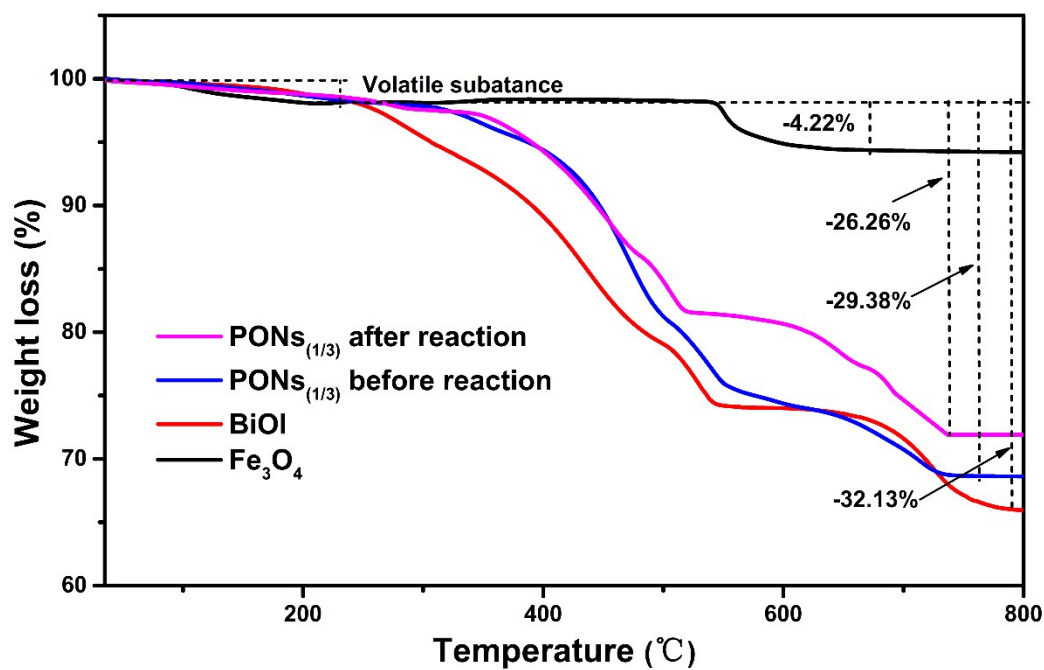

**Fig. S2. TG curves of as-prepared BiOI, Fe<sub>3</sub>O<sub>4</sub>, before and after photocatalytic reaction of PONs<sub>(1/3)</sub>, respectively.**
